# Supplementary material for: Bendiocarb and Malathion Resistance in Two Major Malaria Vector Populations in Cameroon Is Associated with High Frequency of the G119S Mutation (Ace-1) and Overexpression of Detoxification Genes
Source: MDPI journal article supplement (doi:10.3390/pathogens11080824), 2022-07-23
Supplement: s1 [file s1]

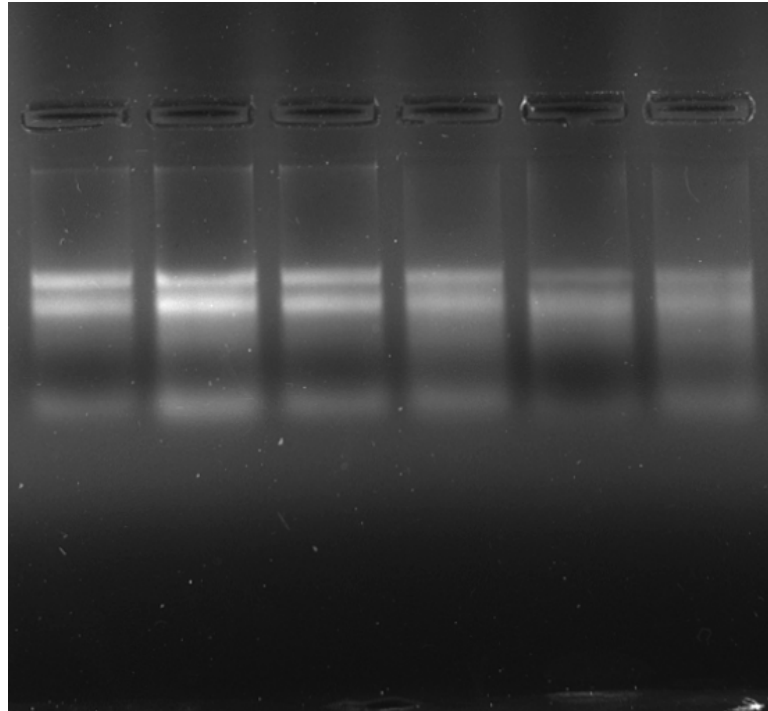

**Figure S1.** Agarose gel (1.0% w/v) electrophoresis for total RNA of representative samples (N=6). The presence of distinct ribosomal bands (28S, 18S, 5S from top to bottom) and the absence of degradation products shows that total RNA was intact, suitable for downstream analyses. .

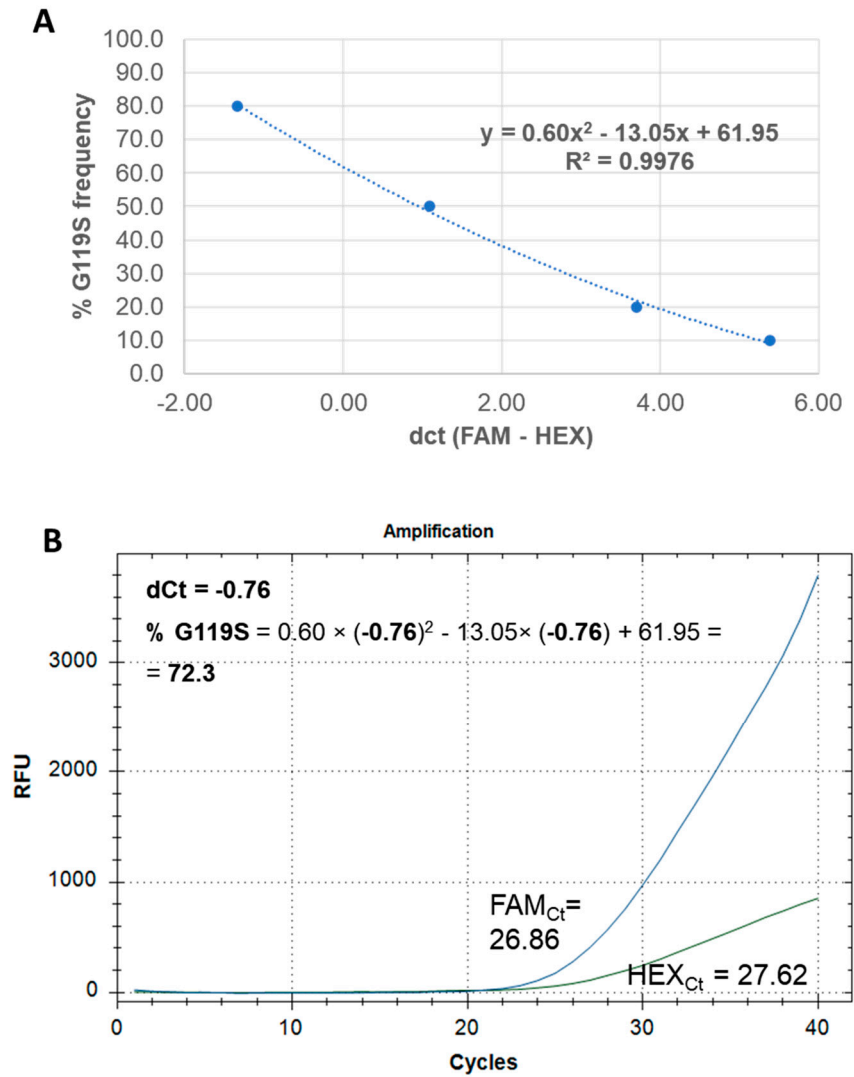

**Figure S2.** Standard curve for G119S using plasmid sequences with known % frequencies (A) and calculation of % G119S for an unknown population of the study as an example (B).

**Table S1** List of primers and probes used for the multiplex resistance gene expression analyses.

| Oligo            | Assay       | Sequence (5'-3')                                | Final Concentration (nM) |
|------------------|-------------|-------------------------------------------------|--------------------------|
| <i>RPS7_F</i>    | Dtx (A)-(D) | CCACCATCGAACACAAAGTTGA                          | 100                      |
| <i>RPS7_R</i>    | Dtx (A)-(D) | TGCTGCAAACCTTCGGCTATTC                          | 200                      |
| <i>RPS7_P</i>    | Dtx (A)-(D) | FAM-CCGTGACGTTACGTTCTGAATTCCCA-BHQ1             | 250                      |
| <i>CYP6P3_F</i>  | Dtx (A)     | ACAATGTGATTGACGAAACCCT                          | 400                      |
| <i>CYP6P3_R</i>  | Dtx (A)     | GGATCACATGCTTTGTGCCG                            | 500                      |
| <i>CYP6P3_P</i>  | Dtx (A)     | HEX-ACCCGCGTACCGTCTGTGGACT-BHQ1                 | 350                      |
| <i>CYP6M2_F</i>  | Dtx (A)     | CTGGCGTTGAATCCAGAGGT                            | 600                      |
| <i>CYP6M2_R</i>  | Dtx (A)     | GATACTTGCGCAGTGATTCATTAAG                       | 400                      |
| <i>CYP6M2_P</i>  | Dtx (A)     | ATTO647N-<br>AGAGAAATCCTGCAAAAGCACACGAGAGA-BHQ3 | 250                      |
| <i>CYP9K1_F</i>  | Dtx (B)     | CCGACACGTGGTGATGGATAC                           | 200                      |
| <i>CYP9K1_R</i>  | Dtx (B)     | CGTCGTCGGTCCAGTCAAC                             | 400                      |
| <i>CYP9K1_P</i>  | Dtx (B)     | HEX-CAATCTTCTGATGCAGGCCCGCAA-BHQ1               | 300                      |
| <i>CYP6P4_F</i>  | Dtx (B)     | CTGGACAACGTTATCAATGAAACC                        | 400                      |
| <i>CYP6P4_R</i>  | Dtx (B)     | GCACGGTGTAAATCACGCATC                           | 500                      |
| <i>CYP6P4_P</i>  | Dtx (B)     | ATTO647N-CCGATCGAGTCACTTTCGCGCG-BHQ3            | 300                      |
| <i>CYP6Z1_F</i>  | Dtx (C)     | CCCGCAACTGTATCGGTCTG                            | 100                      |
| <i>CYP6Z1_R</i>  | Dtx (C)     | TTCGGTGCCAGTGTGATTGA                            | 600                      |
| <i>CYP6Z1_P</i>  | Dtx (C)     | HEX-TGATGCTGTCCCGATTAACTTTTCGGC-BHQ1            | 250                      |
| <i>GSTE2_F</i>   | Dtx (C)     | CCGGAATTTGTGAAGCTAAACC                          | 100                      |
| <i>GSTE2_R</i>   | Dtx (C)     | GCTTGACGGGGTCTTTCGG                             | 400                      |
| <i>GSTE2_P</i>   | Dtx (C)     | ATTO647N-CGGTACGATCATCACCGAGAGCCAC-BHQ3         | 300                      |
| <i>CYP6P1_F</i>  | Dtx (D)     | ACAGGTGGTGAACGAAACCC                            | 100                      |
| <i>CYP6P1_R</i>  | Dtx (D)     | GGTGTAATCCTGTCCCGCAA                            | 500                      |
| <i>CYP6P1_P</i>  | Dtx (D)     | HEX-CCGCTCGAAACGACGCTGCG-BHQ1                   | 300                      |
| <i>CYP4G16_F</i> | Dtx (D)     | GTCCAAGAAGTTGCGTCGGAC                           | 200                      |
| <i>CYP4G16_R</i> | Dtx (D)     | TCTTCGATTGCGTTGACGTG                            | 200                      |
| <i>CYP4G16_P</i> | Dtx (D)     | ATTO647N-CTGCAGGCCGACATCATTTTGAAGC-BHQ3         | 300                      |
